# Supplementary material
Source: publisher figshare collection journal article supplement (https://karger.figshare.com/ndownloader/files/27948795)
Supplement: Supplementary file 1 [file 27948795]

| Group | Number of signals |  | | | Number of chromosomes | | | | | | Total |
| --- | --- | --- | --- | --- | --- | --- | --- | --- | --- | --- | --- |
| ManDra-A |  | 44 | 45 | | 46 | 47 | 48 | 49 | 50 |
| Group A | 26 |  |  |  | |  |  |  | 4 | 31 | 35 |
|  | 25 |  |  |  | |  |  |  | 1 | 3 | 4 |
|  | 24 |  |  |  | |  |  |  | 1 | 2 | 3 |
|  | 23 |  |  |  | |  |  |  |  | 1 | 1 |
|  | 22 |  |  |  | |  |  |  |  |  |  |
|  | 21 |  |  |  | |  |  |  |  |  |  |
|  | 20 |  |  |  | |  |  |  | 1 |  | 1 |
|  |  | Total |  |  | |  |  |  | 7 | 37 | 44 |
|  |  |  |  |  | |  |  |  |  |  |  |
| Group B | 0 |  | 3 |  | | 1 | 3 | 2 | 4 | 44 | 57 |
|  |  | Total | 3 |  | | 1 | 3 | 2 | 4 | 44 | 57 |
|  |  |  |  |  | |  |  |  |  |  |  |

**Supplementary Table S3.** Number of chromosomes and ManDra-A FISH signals detected in the somatic cells of dojo loach.
